# Supplementary material
Source: MDPI journal article supplement (https://www.mdpi.com/2306-5338/10/2/42)
Supplement: s1 [file s1]

Article

# Modeling Surface Water–Groundwater Interactions: Evidence from Borkena Catchment, Awash River Basin, Ethiopia

Wallelegn Jene Gobezie<sup>1</sup>, Ermias Teferi<sup>2,3</sup>, Yihun T. Dile<sup>4</sup>, Haimanote K. Bayabil<sup>5</sup>, Gebiaw T. Ayele<sup>6,\*</sup> and Girma Y. Ebrahim<sup>7</sup>

<sup>1</sup> Ethiopian Institute of Water Resources, Addis Ababa University, Addis Ababa P.O. Box 1176, Ethiopia

<sup>2</sup> Center for Environment and Development Studies, Addis Ababa University, Addis Ababa P.O. Box 1176, Ethiopia

<sup>3</sup> Water and Land Resource Center (WLRC), Addis Ababa University, Addis Ababa P.O. Box 3880, Ethiopia

<sup>4</sup> Spatial Sciences Laboratory in the Development of Ecosystem Sciences and Management, Texas A&M University, College Station, TX 77843, USA

<sup>5</sup> Agricultural and Biological Engineering, Tropical Research and Education Centre, Institute of Food and Agricultural Sciences, University of Florida, Homestead, FL 33031, USA

<sup>6</sup> Australia River Institute and School of Engineering, Griffith University, Nathan, QLD 4111, Australia

<sup>7</sup> International Water Management Institute, Addis Ababa P.O. Box 5689, Ethiopia

\* Correspondence: [gebiaw.ayele@griffithuni.edu.au](mailto:gebiaw.ayele@griffithuni.edu.au) or [gebeyaw21@gmail.com](mailto:gebeyaw21@gmail.com)

## Supplementary Information

Table S1. Groundwater elevation of existing boreholes and Surface elevation of the nearby river cell for each borehole and their differences to indicate if the river is gaining, loosing and either gaining or loosing river

| Well_ID                  | X      | Y       | SWL<br>(mbgl) | GW_Elevation<br>(masl) | Riv_Elevation<br>(masl) | Difference | River_Type                      |
|--------------------------|--------|---------|---------------|------------------------|-------------------------|------------|---------------------------------|
| Kutaber                  | 561487 | 244816  | 3.2           | 2666.8                 | 2680.2                  | -13.4      | gaining                         |
| Boru<br>Sillasse<br>Kb02 | 569164 | 1239609 | 41.5          | 2568                   | 2602.6                  | -34.6      | gaining                         |
| Wollo<br>University      | 568373 | 1238516 | 42.7          | 2561.3                 | 2603.6                  | -42.3      | gaining                         |
| GBH                      | 569589 | 1232065 | 18.87         | 2472.1                 | 2487.8                  | -15.7      | gaining                         |
| DDBH                     | 569138 | 1232098 | 26.1          | 2470.9                 | 2489.6                  | -18.7      | gaining                         |
| PW3                      | 579565 | 1226611 | 0             | 1848                   | 1833.6                  | 14.4       | loosing                         |
| KCVTW-<br>02-19          | 578915 | 1226614 | 0             | 1839.8                 | 1841                    | -1.2       | gaining                         |
| KCPW-2                   | 579066 | 1226301 | 6.96          | 1831                   | 1833.4                  | -2.4       | gaining                         |
| Well One                 | 579376 | 1226205 | 1.66          | 1832.9                 | 1831.4                  | 1.5        | loosing                         |
| BH-1                     | 579647 | 1226175 | 0             | 1832.7                 | 1831.4                  | 1.3        | loosing                         |
| BGI-3                    | 579337 | 1224720 | 0             | 1827                   | 1826.2                  | 0.8        | loosing                         |
| HrW4                     | 584466 | 1208649 | 0             | 1485.8                 | 1485.8                  | 0          | either<br>gaining or<br>loosing |
| HrBH-3                   | 584806 | 1208276 | 0             | 1485                   | 1481.5                  | 3.5        | loosing                         |
| HCKTW1                   | 582859 | 1207575 | 5             | 1499.4                 | 1495                    | 4.4        | loosing                         |
| Harbu Kut                | 583712 | 1206639 | 0             | 1475                   | 1470                    | 5          | loosing                         |
| HrBH2                    | 585040 | 1206425 | 6             | 1469                   | 1469                    | 0          | either<br>gaining or<br>loosing |
| HrBH3                    | 586180 | 1205450 | 0             | 1471                   | 1464                    | 7          | loosing                         |

---

|                      |        |         |       |         |        |       |                                 |
|----------------------|--------|---------|-------|---------|--------|-------|---------------------------------|
| HCKTW#5              | 585874 | 1203916 | 0     | 1459    | 1459   | 0     | either<br>gaining or<br>loosing |
| TUCHE                | 585983 | 1192236 | 0     | 1460    | 1458   | 2     | loosing                         |
| Girma's bh           | 589091 | 1194110 | 0     | 1436    | 1435   | 1     | loosing                         |
| Dewacheffa<br>Shekla | 590348 | 1193360 | 5.4   | 1440    | 1440   | 0     | either<br>gaining or<br>loosing |
| KCVTW-<br>03-19      | 586891 | 1189916 | 0     | 1444    | 1444   | 0     | either<br>gaining or<br>loosing |
| KCPW-1               | 588411 | 1189219 | 4.7   | 1423.3  | 1430   | -6.7  | gaining                         |
| CKBH1                | 586795 | 1186734 | 14.5  | 1442.5  | 1447.4 | -4.9  | gaining                         |
| HCKPW07              | 590430 | 1186027 | 0     | 1422.7  | 1422.9 | -0.2  | gaining                         |
| HCKPW-<br>14         | 590446 | 1185131 | 0     | 1428    | 1420   | 8     | loosing                         |
| HCKTW2               | 587545 | 1182629 | 8.3   | 1438.7  | 1436.9 | 1.8   | loosing                         |
| Bilacha              | 595434 | 1187099 | 4.1   | 1477.9  | 1473   | 4.9   | loosing                         |
| KW-4                 | 595464 | 1186863 | 5.8   | 1470.2  | 1470.2 | 0     | either<br>gaining or<br>loosing |
| KW-3                 | 595586 | 1186261 | 5.97  | 1470.16 | 1471   | -0.84 | gaining                         |
| KW-1                 | 595093 | 1185847 | 11.13 | 1437    | 1447   | -10   | gaining                         |
| KW5                  | 597030 | 1184798 | 9.3   | 1447    | 1456   | -9    | gaining                         |
| Chereti bh           | 600932 | 1172716 | 6     | 1415.6  | 1416   | -0.4  | gaining                         |
| H/Mesno<br>bh        | 593218 | 1172644 | 0     | 1423    | 1420   | 3     | loosing                         |

---

Table S2. Assigned River cells in to SWAT-MODFLOW interface

| Layer | Row | Column | River Stage | River Conductance | River Elevation | Layer | Row | Column | River Stage | River Conductance | River Elevation |
|-------|-----|--------|-------------|-------------------|-----------------|-------|-----|--------|-------------|-------------------|-----------------|
| 1     | 12  | 13     | 1825.703    | 60000             | 1825.6          | 1     | 27  | 9      | 1441.238    | 135000            | 1441.4          |
| 1     | 13  | 13     | 1800.413    | 60000             | 1800            | 1     | 28  | 9      | 1440.818    | 140000            | 1440.7          |
| 1     | 14  | 13     | 1776.773    | 70000             | 1776.6          | 1     | 28  | 8      | 1436.908    | 145000            | 1436.8          |
| 1     | 14  | 12     | 1759.223    | 70000             | 1759            | 1     | 29  | 8      | 1435.321    | 155000            | 1435.2          |
| 1     | 15  | 12     | 1730.358    | 80000             | 1730.2          | 1     | 29  | 7      | 1431.606    | 155000            | 1431.5          |
| 1     | 16  | 12     | 1703.918    | 80000             | 1703.7          | 1     | 30  | 7      | 1430.908    | 155000            | 1430.8          |
| 1     | 17  | 12     | 1675.774    | 90000             | 1675.6          | 1     | 30  | 8      | 1430.816    | 167000            | 1430.7          |
| 1     | 18  | 12     | 1658.238    | 90000             | 1657.9          | 1     | 31  | 8      | 1426.646    | 167000            | 1426.5          |
| 1     | 18  | 11     | 1623.308    | 80000             | 1623.1          | 1     | 32  | 8      | 1423.186    | 167000            | 1423            |
| 1     | 19  | 11     | 1556.166    | 85000             | 1550.9          | 1     | 32  | 7      | 1422.708    | 171000            | 1422            |
| 1     | 20  | 11     | 1498.866    | 66667             | 1498.7          | 1     | 33  | 7      | 1419.958    | 171000            | 1419.8          |
| 1     | 21  | 11     | 1487.626    | 66667             | 1487.3          | 1     | 34  | 7      | 1416.346    | 171000            | 1416.2          |
| 1     | 21  | 10     | 1482.738    | 77778             | 1482.3          | 1     | 34  | 6      | 1415.096    | 171000            | 1414.9          |
| 1     | 22  | 10     | 1473.258    | 78000             | 1472.9          | 1     | 35  | 6      | 1412.996    | 178000            | 1412.9          |
| 1     | 22  | 11     | 1469.728    | 88000             | 1469.7          | 1     | 34  | 6      | 1412.508    | 178000            | 1412.4          |
| 1     | 23  | 11     | 1459.906    | 98700             | 1459.8          | 1     | 34  | 5      | 1412.408    | 178000            | 1412.3          |
| 1     | 23  | 10     | 1459.786    | 100000            | 1459.6          | 1     | 35  | 5      | 1412.377    | 183000            | 1412.2          |

|   |    |    |          |        |        |   |    |   |          |        |        |
|---|----|----|----------|--------|--------|---|----|---|----------|--------|--------|
| 1 | 24 | 10 | 1457.326 | 100000 | 1457   | 1 | 34 | 5 | 1411.996 | 183000 | 1411.9 |
| 1 | 24 | 9  | 1453.228 | 120000 | 1453   | 1 | 34 | 4 | 1410.678 | 183000 | 1410.5 |
| 1 | 25 | 9  | 1449.956 | 120000 | 1449.9 | 1 | 35 | 4 | 1410.407 | 185000 | 1410.2 |
| 1 | 25 | 10 | 1447.746 | 130000 | 1447.6 | 1 | 36 | 4 | 1409.887 | 185000 | 1409.7 |
| 1 | 26 | 10 | 1447.446 | 133000 | 1447.3 |   |    |   |          |        |        |
| 1 | 27 | 10 | 1443.566 | 133000 | 1443.2 |   |    |   |          |        |        |

Table S3. Assigned observation wells in to SWAT-MODFLOW interface

| No | Obs_well        | Row | Colum | layer of cell |
|----|-----------------|-----|-------|---------------|
| 1  | Kutaber Well    | 3   | 2     | 1             |
| 2  | Borusillase     | 5   | 6     | 1             |
| 3  | Wollouniversity | 6   | 5     | 1             |
| 4  | KCVTW-02-19     | 12  | 11    | 1             |
| 5  | BGI New-2       | 13  | 11    | 1             |
| 6  | HCKTW1          | 21  | 13    | 1             |
| 7  | Harbu           | 22  | 13    | 1             |
| 8  | KCVTW-03-19     | 30  | 15    | 1             |
| 9  | Bilacha Keb     | 32  | 19    | 1             |
| 10 | KW-2            | 32  | 19    | 1             |
| 11 | HCKTW2          | 34  | 15    | 1             |
| 12 | H/mesno bh      | 39  | 18    | 1             |
| 13 | Chereti bh      | 39  | 22    | 1             |
| 14 | Tuche           | 29  | 14    | 1             |
| 15 | KCPW#5          | 23  | 14    | 1             |
| 16 | HCKTW3          | 32  | 16    | 1             |

Table S4. Default values/outputs/ of Groundwater-Surface water interaction in m<sup>3</sup>/d after SWAT-MODFLOW simulation

| Cell No | Exchange Values |            |            |            |            |            |            |            |
|---------|-----------------|------------|------------|------------|------------|------------|------------|------------|
| 1       | 0.00            | 0.00       | 0.00       | 0.00       | 0.00       | 0.00       | 0.00       | 0.00       |
| 2       | 0.00            | 0.00       | 0.00       | 0.00       | 0.00       | 0.00       | 0.00       | -16838.10  |
| 3       | 0.00            | 0.00       | 0.00       | 0.00       | 0.00       | 0.00       | 0.00       | 0.00       |
| 4       | 0.00            | 0.00       | 0.00       | 0.00       | 0.00       | 0.00       | 0.00       | 0.00       |
| 5       | 3096.11         | 3096.11    | 3096.11    | 3096.11    | 3096.11    | 3096.11    | 3096.11    | 3096.11    |
| 6       | 0.00            | 0.00       | 0.00       | 0.00       | 0.00       | 0.00       | 0.00       | 0.00       |
| 7       | 1189.56         | 1189.56    | 1189.56    | 1189.56    | 1189.56    | 1189.56    | 1189.56    | 1189.56    |
| 8       | -251672.00      | -242128.00 | -259402.00 | -264391.00 | -267444.00 | -281259.00 | -277611.00 | -291506.00 |
| 9       | -374321.00      | -368751.00 | -377817.00 | -382794.00 | -388018.00 | -398920.00 | -398370.00 | -402206.00 |
| 10      | -187227.00      | -195562.00 | -207724.00 | -215549.00 | -222721.00 | -232816.00 | -236576.00 | -241351.00 |
| 11      | -336034.00      | -329516.00 | -337116.00 | -338222.00 | -341320.00 | -350209.00 | -349816.00 | -353444.00 |
| 12      | -462105.00      | -456901.00 | -466528.00 | -470942.00 | -476583.00 | -487857.00 | -487548.00 | -491557.00 |
| 13      | -312306.00      | -306213.00 | -316024.00 | -319978.00 | -325891.00 | -337573.00 | -337606.00 | -342219.00 |
| 14      | 0.00            | 0.00       | 0.00       | 0.00       | 0.00       | 0.00       | 0.00       | 0.00       |
| 15      | 0.00            | 0.00       | 0.00       | 0.00       | 0.00       | 0.00       | 0.00       | 0.00       |
| 16      | 0.00            | 0.00       | 0.00       | 0.00       | 0.00       | 0.00       | 0.00       | 0.00       |
| 17      | 0.00            | 0.00       | 0.00       | 0.00       | 0.00       | 0.00       | 0.00       | 0.00       |
| 18      | -380055.00      | -374428.00 | -387370.00 | -391428.00 | -397702.00 | -410589.00 | -410295.00 | -416267.00 |

---

|    |            |            |            |            |            |            |            |            |
|----|------------|------------|------------|------------|------------|------------|------------|------------|
| 19 | 870.05     | 3474.89    | 1305.07    | 1305.07    | 2175.12    | 2175.12    | 3909.92    | 2610.15    |
| 20 | -264722.00 | -258140.00 | -266412.00 | -267660.00 | -271286.00 | -280882.00 | -280013.00 | -283568.00 |
| 21 | -390223.00 | -383672.00 | -391762.00 | -394740.00 | -398963.00 | -408793.00 | -407237.00 | -409931.00 |
| 22 | -214171.00 | -212872.00 | -224249.00 | -229888.00 | -234928.00 | -245504.00 | -244897.00 | -249021.00 |
| 23 | 652.44     | 2605.77    | 978.65     | 978.65     | 1631.09    | 1631.09    | 2931.99    | 1957.31    |
| 24 | 1957.51    | 7818.10    | 2936.27    | 2936.27    | 4893.77    | 4893.77    | 8796.86    | 5872.53    |
| 25 | 2972.30    | 11871.08   | 4458.45    | 4458.45    | 7430.75    | 7430.75    | 9440.22    | -17471.00  |
| 26 | 3842.35    | 15345.97   | 5763.52    | 5763.52    | 9605.87    | 9605.87    | 17267.14   | 11527.05   |
| 27 | 3697.41    | 14767.08   | 5546.11    | 5546.11    | 9243.52    | 9243.52    | 16615.79   | 11092.22   |
| 28 | 6307.15    | 25190.15   | 9460.73    | 9460.73    | 15767.88   | 15767.88   | 28343.73   | 18921.46   |
| 29 | -87164.60  | -94766.60  | -102881.00 | -110281.00 | -117201.00 | -124183.00 | -130476.00 | -136921.00 |
| 30 | 4712.40    | 18820.86   | 7068.60    | 7068.60    | 11780.99   | 11780.99   | 21177.05   | 14137.19   |
| 31 | 2319.86    | 9265.31    | -14683.30  | -33718.00  | -48395.20  | -86773.00  | -117257.00 | -141692.00 |
| 32 | 7244.42    | 35921.48   | 14338.53   | 14338.53   | -11278.30  | -40403.70  | -48062.00  | -85932.90  |
| 33 | 5437.31    | -14772.70  | -61886.00  | -86766.80  | -101224.00 | -116029.00 | -136770.00 | -161532.00 |
| 34 | 3096.11    | -487857.00 | 3096.11    | 3096.11    | 586.14     | 3096.11    | 3096.11    | 3661.07    |

---
